# Supplementary material for: RNA Host Response-Based Diagnosis of Tick-Borne Infections using Machine Learning and Generative Artificial Intelligence
Source: Research Square preprint supplement (doi:10.21203/rs.3.rs-7643069/v1), 2025-09-30
Supplement: Supplementary file 1 [file 7bff4b2ac45b63a8aaa6e8bc.xlsx]

## Sheet: sample_characteristics_v3
sampleID	age ≥70	sex	class	specific_class	coll site	processing_site	set	raw reads	% coverage	% total mapped
WB001	N	Female	lyme	lyme	columbia	UCSF	train	89498132	43.04	94.33
WB002	N	Female	lyme	lyme	columbia	UCSF	train	75314536	43.46	96.59
WB003	N	Male	lyme	lyme	columbia	UCSF	train	79235514	41.47	92.66
WB004	N	Female	lyme	lyme	columbia	UCSF	train	148537586	49.59	97.27
WB005	N	Female	lyme	lyme	columbia	UCSF	train	60555062	36.94	95.48
WB006	N	Female	lyme	lyme	columbia	UCSF	train	122005772	46.47	96.69
WB007	Y	Female	lyme	lyme	columbia	UCSF	train	62886710	38.85	94.92
WB008	N	Male	lyme	lyme	columbia	UCSF	train	63288752	40.57	94.43
WB009	Y	Female	lyme	lyme	columbia	UCSF	train	75199172	42.63	95.68
WB010	N	Male	lyme	lyme	columbia	UCSF	train	73954524	39.75	96.65
WB011	N	Female	lyme	lyme	columbia	UCSF	train	80227452	49.6	92.31
WB012	Y	Male	lyme	lyme	columbia	UCSF	train	87862740	46.4	97.18
WB013	N	Male	lyme	lyme	columbia	UCSF	train	112118662	70.69	90.82
WB014	Y	Female	lyme	lyme	LBB	UCSF	train	15984142	28.99	73.18
WB015	N	Female	lyme	lyme	LBB	UCSF	train	38737260	34.45	77.97
WB016	N	Male	lyme	lyme	LBB	UCSF	train	38149800	37.58	80.03
WB017	N	Female	lyme	lyme	LBB	UCSF	train	39149300	31.76	83.82
WB018	N	Female	lyme	lyme	LBB	UCSF	train	39148544	35.94	80.94
WB019	N	Female	lyme	lyme	LBB	UCSF	train	29860768	31.99	79.42
WB020	Y	Female	lyme	lyme	LBB	UCSF	train	47708902	32.31	80.52
WB021	N	Female	lyme	lyme	LBB	UCSF	train	49725472	20.54	81.33
WB022	N	Male	lyme	lyme	LBB	UCSF	train	35416336	28.45	77.44
WB023	N	Male	lyme	lyme	LBB	UCSF	train	36764102	51.5	80.85
WB024	N	Female	lyme	lyme	LBB	UCSF	train	21337780	51.37	83.54
WB025	N	Female	lyme	lyme	LBB	UCSF	train	14401350	50.67	81.93
WB026	N	Male	lyme	lyme	LBB	UCSF	train	27311806	51.13	84.53
WB027	N	Female	lyme	lyme	LBB	UCSF	train	38780452	51.49	85.77
WB028	N	Female	lyme	lyme	LBB	UCSF	train	22750662	51.31	80.86
WB029	N	Male	lyme	lyme	LBB	UCSF	train	11631592	47.82	78.26
WB030	N	Male	lyme	lyme	LBB	UCSF	train	34157488	39.35	77.15
WB031	N	Male	lyme	lyme	LBB	UCSF	train	39014234	55.21	83.42
WB032	N	Female	lyme	lyme	LBB	UCSF	train	69188968	34.75	94.12
WB033	N	Female	lyme	lyme	LBB	UCSF	train	29280190	27.44	80.05
WB034	N	Female	lyme	lyme	LBB	UCSF	train	59150702	27.88	82.99
WB035	N	Male	lyme	lyme	LBB	UCSF	train	65295248	35.69	76.96
WB036	N	Male	lyme	lyme	LBB	UCSF	train	79212264	20.71	97.38
WB037	N	Male	lyme	lyme	LBB	UCSF	train	56517852	41.27	91.01
WB038	N	Female	lyme	lyme	LBB	UCSF	train	38843706	40.88	92.3
WB039	N	Male	lyme	lyme	LBB	UCSF	train	97355572	27.16	76.61
WB040	N	Male	lyme	lyme	LBB	UCSF	train	30007360	36.72	81.02
WB041	N	Female	lyme	lyme	LBB	UCSF	train	78502028	27.34	95.44
WB042	N	Male	lyme	lyme	LBB	UCSF	train	33448712	33.97	93.62
WB043	N	Male	lyme	lyme	LBB	UCSF	train	72391284	36.76	91.84
WB044	N	Male	lyme	lyme	LBB	UCSF	train	101953750	42.19	89.59
WB045	N	Female	lyme	lyme	LBB	UCSF	train	101386286	40.14	95.42
WB046	N	Male	lyme	lyme	LBB	UCSF	train	92469842	38.35	93.97
WB047	N	Male	lyme	lyme	LBB	UCSF	train	83227564	39.79	96.97
WB048	Y	Female	lyme	lyme	LBB	UCSF	train	86958316	35.57	95.68
WB049	N	Male	lyme	lyme	LBB	UCSF	train	126531246	42.36	97.48
WB050	N	Male	lyme	lyme	LBB	UCSF	train	66159216	33.52	87.21
WB051	N	Male	lyme	lyme	LBB	UCSF	train	62344752	34.79	79.61
WB052	Y	Female	lyme	lyme	LBB	UCSF	train	49792542	37.27	95.5
WB053	N	Male	lyme	lyme	LBB	UCSF	train	80527130	37.08	96.03
WB054	N	Male	lyme	lyme	LBB	UCSF	train	55878936	36.89	92.61
WB055	Y	Female	lyme	lyme	LBB	UCSF	train	124742670	41.72	91.04
WB056	N	Male	lyme	lyme	LBB	UCSF	train	46756048	35.96	96.91
WB057	N	Female	non	babesia	LBB	UCSF	train	41353126	34.27	92.79
WB058	N	Male	non	babesia	LBB	UCSF	train	78029142	28.32	32.14
WB059	N	Female	non	babesia	LBB	UCSF	train	109884262	36.15	86.73
WB060	N	Male	non	babesia	LBB	UCSF	train	57983568	39.86	70.57
WB061	N	Male	non	babesia	LBB	UCSF	train	104321266	35.6	93.07
WB062	N	Female	non	babesia	ARC	UCSF	train	36185514	42.93	92.04
WB063	N	Female	non	babesia	ARC	UCSF	train	72246612	11.4	15.81
WB064	N	Male	non	babesia	ARC	UCSF	train	17286722	19.91	75.5
WB065	N	Female	non	babesia	ARC	UCSF	train	60609526	28.54	81.65
WB066	N	Male	non	babesia	ARC	UCSF	train	112558940	29.55	93.8
WB067	N	Male	non	babesia	ARC	UCSF	train	113948350	36.69	93.18
WB068	N	Male	non	babesia	ARC	UCSF	train	24613322	28.02	84.2
WB069	N	Male	non	babesia	ARC	UCSF	train	74692262	22.02	86.02
WB070	N	Female	non	babesia	ARC	UCSF	train	47619344	35	86.67
WB071	N	Female	non	babesia	ARC	UCSF	train	62755112	39.5	86.3
WB072	N	Female	non	babesia	ARC	UCSF	train	61146186	31.25	79.33
WB073	Y	Male	non	babesia	ARC	UCSF	train	46469748	42.36	86.77
WB074	N	Female	non	babesia	ARC	UCSF	train	52099832	41.19	83.99
WB075	N	Female	non	babesia	ARC	UCSF	train	49888092	68.16	88.58
WB076	N	Male	non	babesia	ARC	UCSF	train	66503912	29.14	85.22
WB077	Y	Male	non	babesia	ARC	UCSF	train	21769474	59.57	83.68
WB078	N	Male	non	babesia	ARC	UCSF	train	59448262	19.45	83.63
WB079	N	Male	non	babesia	ARC	UCSF	train	33831112	25.82	87.82
WB080	N	Male	non	babesia	ARC	UCSF	train	14272922	35.85	83.25
WB081	Y	Male	non	babesia	ARC	UCSF	train	20544050	33.18	86.64
WB082	Y	Male	non	babesia	ARC	UCSF	train	11377568	40.38	84.84
WB083	N	Male	non	babesia	ARC	UCSF	train	26581082	21.38	85.35
WB084	N	Male	non	babesia	ARC	UCSF	train	24532896	42.13	88.44
WB085	N	Female	non	babesia	ARC	UCSF	train	26498826	39.32	85.92
WB086	N	Male	non	babesia	ARC	UCSF	train	79118754	43.8	86.58
WB087	Y	Male	non	babesia	ARC	UCSF	train	28915964	40.52	86.74
WB088	Y	Male	non	babesia	ARC	UCSF	train	19775378	32.94	85.48
WB089	N	Male	non	babesia	ARC	UCSF	train	28739418	20.71	82.7
WB090	Y	Male	non	babesia	ARC	UCSF	train	73331094	17.81	85.89
WB091	Y	Male	non	babesia	ARC	UCSF	train	35230920	11.93	87.78
WB092	N	Male	non	babesia	ARC	UCSF	train	31870340	22.29	86.64
WB093	Y	Male	non	babesia	ARC	UCSF	train	40686170	26.54	88.09
WB094	N	Male	non	babesia	ARC	UCSF	train	14367750	32.44	86.28
WB095	N	Female	non	babesia	ARC	UCSF	train	71993340	22.31	85.39
WB096	N	Male	non	babesia	ARC	UCSF	train	26902694	28.88	86.26
WB097	N	Male	non	babesia	ARC	UCSF	train	45282860	20.55	84.55
WB098	N	Male	non	babesia	ARC	UCSF	train	30091320	18.22	82.44
WB099	N	Male	non	babesia	ARC	UCSF	train	23356900	24.43	86.7
WB100	N	Female	non	babesia	ARC	UCSF	train	25091412	21.63	87.69
WB101	N	Male	non	babesia	ARC	UCSF	train	31734322	21.4	87.29
WB102	N	Female	non	babesia	ARC	UCSF	train	42948596	16.31	86.91
WB103	Y	Male	non	babesia	ARC	UCSF	train	34811902	18.01	88.57
WB104	N	Female	non	babesia	ARC	UCSF	train	33209206	23.93	88.46
WB105	Y	Male	non	babesia	ARC	UCSF	train	26202198	16.76	80.75
WB106	Y	Female	non	babesia	ARC	UCSF	train	28495686	20.93	82.29
WB107	N	Male	non	babesia	ARC	UCSF	train	54326938	30.35	86.27
WB108	N	Male	non	babesia	ARC	UCSF	train	22841884	21.73	84
WB109	N	Male	non	babesia	ARC	UCSF	train	69124552	37.7	89.96
WB110	N	Male	non	babesia	ARC	UCSF	train	80326016	34.76	84.96
WB111	N	Female	non	babesia	ARC	UCSF	train	52256582	28.68	86.79
WB112	Y	Female	non	babesia	ARC	UCSF	train	47135648	35.69	90.99
WB113	N	Male	non	babesia	ARC	UCSF	train	61639554	33.1	88.4
WB114	N	Male	non	babesia	ARC	UCSF	train	83223582	21.78	85.04
WB115	N	Male	non	babesia	ARC	UCSF	train	87287220	35.67	86.91
WB116	N	Male	non	babesia	ARC	UCSF	train	41656066	32.39	95.14
WB117	Y	Female	non	babesia	ARC	UCSF	train	236674374	50.53	80.96
WB118	Y	Male	non	babesia	ARC	UCSF	train	34281488	58.44	90.28
WB119	N	Male	non	babesia	ARC	UCSF	train	32071090	31.76	94.7
WB120	N	Female	non	babesia	ARC	UCSF	train	25988924	21.91	70.5
WB121	N	Female	non	babesia	ARC	UCSF	train	46044954	33.38	83.86
WB122	N	Female	non	babesia	ARC	UCSF	train	71156204	27.88	84.43
WB123	N	Male	non	babesia	ARC	UCSF	train	46472062	19.62	80.74
WB124	N	Male	non	babesia	ARC	UCSF	train	48881160	43.24	87.57
WB125	N	Female	non	babesia	ARC	UCSF	train	51523170	19.09	82.25
WB126	N	Female	non	babesia	ARC	UCSF	train	35546076	21.41	82.49
WB127	N	Female	non	babesia	ARC	UCSF	train	37220658	40.17	85.14
WB128	N	Male	non	babesia	ARC	UCSF	train	36322756	18.48	80.24
WB129	N	Female	non	babesia	ARC	UCSF	train	45306974	27.37	82.59
WB130	N	Male	non	anaplasma	LBB	UCSF	train	107065856	14.32	80.93
WB131	N	Male	non	anaplasma	LBB	UCSF	train	94250038	34.85	95.38
WB132	Y	Male	non	anaplasma	LBB	UCSF	train	36164582	36.17	91.09
WB133	N	Male	non	anaplasma	LBB	UCSF	train	80537014	37.01	94.69
WB134	Y	Female	non	flu	UCSF	UCSF	train	80993434	37.38	96.94
WB135	N	Male	non	flu	UCSF	UCSF	train	63086060	36.47	96.54
WB136	N	Female	non	flu	UCSF	UCSF	train	98614118	41.64	95.43
WB137	N	Female	non	flu	UCSF	UCSF	train	86866908	36.21	92.8
WB138	Y	Female	non	flu	UCSF	UCSF	train	98918230	41.57	94.45
WB139	N	Male	non	flu	UCSF	UCSF	train	64337762	31.3	97.34
WB140	N	Female	non	flu	UCSF	UCSF	train	225698070	42.31	93.56
WB141	N	Male	non	flu	UCSF	UCSF	train	57264068	32.16	90.51
WB142	N	Female	non	flu	UCSF	UCSF	train	54538852	28.54	91.49
WB143	N	Female	non	flu	UCSF	UCSF	train	109185332	40.95	93.88
WB144	N	Female	non	flu	UCSF	UCSF	train	100316280	34.66	87.1
WB145	N	Female	non	flu	UCSF	UCSF	train	47071324	27.92	87.65
WB146	N	Male	non	flu	UCSF	UCSF	train	42901232	33.35	93.01
WB147	N	Male	non	flu	UCSF	UCSF	train	135053264	68.11	91.84
WB148	N	Male	non	flu	UCSF	UCSF	train	58798428	38.57	89.24
WB149	N	Male	non	flu	UCSF	UCSF	train	111133232	45.31	92.32
WB150	Y	Male	non	flu	UCSF	UCSF	train	15508710	23.76	78.35
WB151	Y	Female	non	sepsis	UCSF	UCSF	train	105193484	37.73	95.35
WB152	N	Male	non	sepsis	UCSF	UCSF	train	31614650	31.94	85.23
WB153	N	Female	non	sepsis	UCSF	UCSF	train	86662602	41.01	94.41
WB154	N	Male	non	sepsis	UCSF	UCSF	train	42209798	32.26	94.85
WB155	N	Male	non	sepsis	UCSF	UCSF	train	108345564	40.92	91.33
WB156	Y	Male	non	sepsis	UCSF	UCSF	train	124853264	35.77	94.88
WB157	Y	Male	non	sepsis	UCSF	UCSF	train	167064146	43.43	96.67
WB158	N	Female	non	sepsis	UCSF	UCSF	train	48777056	38.08	95.78
WB159	N	Male	non	sepsis	UCSF	UCSF	train	140882932	40.26	95.28
WB160	Y	Male	non	sepsis	UCSF	UCSF	train	88365214	39.65	97.15
WB161	N	Female	non	sepsis	UCSF	UCSF	train	59020040	40.17	97.16
WB162	N	Female	non	sepsis	UCSF	UCSF	train	120461984	42.57	92.89
WB163	Y	Male	non	sepsis	UCSF	UCSF	train	106523332	44.52	96.36
WB164	Y	Female	non	sepsis	UCSF	UCSF	train	68770094	38.23	93.67
WB165	N	Male	non	sepsis	UCSF	UCSF	train	102511410	31.55	97.02
WB166	Y	Male	non	sepsis	UCSF	UCSF	train	166138096	42.67	95.64
WB167	Y	Male	non	sepsis	UCSF	UCSF	train	68986210	37.73	94.66
WB168	N	Male	non	sepsis	UCSF	UCSF	train	83890216	39.48	89.97
WB169	N	Male	non	sepsis	UCSF	UCSF	train	129575096	45.92	90.97
WB170	Y	Female	non	sepsis	UCSF	UCSF	train	126719144	79.5	93.04
WB171	N	Male	non	sepsis	UCSF	UCSF	train	95891130	56.52	89.46
WB172	N	Female	non	sepsis	UCSF	UCSF	train	104694804	36.59	89.95
WB173	Y	Male	non	sepsis	UCSF	UCSF	train	100327684	58.38	89.11
WB174	N	Female	non	ill_ctrls	LBB	UCSF	train	95487004	31.74	94.78
WB175	N	Male	non	ill_ctrls	LBB	UCSF	train	59453090	29.86	93.66
WB176	N	Female	non	ill_ctrls	LBB	UCSF	train	53537368	35.74	88.93
WB177	N	Male	non	ill_ctrls	LBB	UCSF	train	150688538	35.71	95.94
WB178	N	Female	non	ill_ctrls	LBB	UCSF	train	39201824	28.76	89.77
WB179	N	Male	non	ill_ctrls	LBB	UCSF	train	48712910	36.54	92.52
WB180	N	Female	non	ill_ctrls	LBB	UCSF	train	62435938	30.53	89
WB181	N	Male	non	covid	UCSF	UCSF	train	82980110	54.59	86.5
WB182	Y	Female	non	covid	UCSF	UCSF	train	139167670	28.53	88.24
WB183	Y	Male	non	covid	UCSF	UCSF	train	127234928	39.23	92.1
WB184	N	Male	non	covid	UCSF	UCSF	train	113164656	44.55	89.18
WB185	Y	Male	non	covid	UCSF	UCSF	train	104529416	35.36	91.12
WB186	Y	Male	non	covid	UCSF	UCSF	train	97378424	24.27	97.08
WB187	Y	Male	non	covid	UCSF	UCSF	train	86689916	40.88	92.14
WB188	Y	Male	non	covid	UCSF	UCSF	train	113924890	42.59	84.79
WB189	N	Male	non	covid	UCSF	UCSF	train	153208990	52.92	84.43
WB190	N	Male	non	covid	UCSF	UCSF	train	97811710	57.96	83.14
WB191	Y	Male	non	covid	UCSF	UCSF	train	162024342	88.57	85.79
WB192	Y	Female	non	covid	UCSF	UCSF	train	87537740	85.19	85.28
WB193	N	Male	non	covid	UCSF	UCSF	train	124204694	66.1	85.8
WB194	N	Female	non	covid	UCSF	UCSF	train	105629698	56.93	87.3
WB195	N	Male	non	covid	UCSF	UCSF	train	96318822	62.85	85.92
WB196	N	Male	non	covid	UCSF	UCSF	train	96923022	50.3	86.94
WB197	Y	Male	non	covid	UCSF	UCSF	train	97658106	56.24	87.68
WB198	Y	Female	non	covid	UCSF	UCSF	train	130239114	82.83	85.86
WB199	N	Female	non	covid	UCSF	UCSF	train	101007704	74.6	89.96
WB200	Y	Female	non	covid	UCSF	UCSF	train	81656220	83.58	79.84
WB201	Y	Female	non	covid	UCSF	UCSF	train	67132968	73.05	74.59
WB202	N	Male	non	covid	UCSF	UCSF	train	80091180	88.46	80.67
WB203	Y	Female	non	covid	UCSF	UCSF	train	64381304	85.98	77.49
WB204	N	Female	non	covid	UCSF	UCSF	train	53499648	49.92	76.96
WB205	Y	Male	non	covid	UCSF	UCSF	train	42994178	70.82	75.44
WB206	N	Female	non	ctrls	LBB	UCSF	train	91377512	40.97	96.45
WB207	N	Female	non	ctrls	LBB	UCSF	train	129161800	41.69	89.69
WB208	Y	Female	non	ctrls	LBB	UCSF	train	164870436	42.86	89.39
WB209	N	Male	non	ctrls	LBB	UCSF	train	116966544	54.81	92.25
WB210	N	Female	non	ctrls	LBB	UCSF	train	99631742	40.15	96.73
WB211	Y	Male	non	ctrls	LBB	UCSF	train	36323870	30.4	92.99
WB212	N	Female	non	ctrls	LBB	UCSF	train	38012528	29.38	93.51
WB213	Y	Male	non	ctrls	LBB	UCSF	train	100693216	29.89	93.43
WB214	N	Female	non	ctrls	LBB	UCSF	train	57318832	35.18	88.7
WB215	N	Female	non	ctrls	LBB	UCSF	train	56423686	34.26	94.65
WB216	N	Male	non	ctrls	LBB	UCSF	train	33563818	29.49	90.66
WB217	N	Male	non	ctrls	LBB	UCSF	train	56208888	36.45	96.83
WB218	N	Female	non	ctrls	LBB	UCSF	train	35094220	33.61	94.01
WB219	N	Male	non	ctrls	LBB	UCSF	train	44163880	36.57	94.68
WB220	N	Female	non	ctrls	LBB	UCSF	train	108005770	22.96	97.5
WB221	N	Female	non	ctrls	LBB	UCSF	train	153989712	45.98	94.46
WB222	N	Male	non	ctrls	LBB	UCSF	train	82710904	33.99	91.74
WB223	N	Female	non	ctrls	LBB	UCSF	train	42433504	37.48	78.53
WB224	N	Female	non	ctrls	LBB	UCSF	train	31538784	37.26	82.59
WB225	N	Male	non	ctrls	LBB	UCSF	train	43382922	44.68	81.33
WB226	N	Male	non	ctrls	LBB	UCSF	train	23889322	51.58	81.33
WB227	N	Female	non	ctrls	LBB	UCSF	train	61464522	32.39	85.85
WB228	NA	NA	non	ctrls	Columbia	UCSF	train	86230950	41.28	95.02
WB229	NA	NA	non	ctrls	Columbia	UCSF	train	67454074	39.36	90.67
WB230	NA	NA	non	ctrls	UCSF	UCSF	train	68653314	39.51	92.34
WB231	NA	NA	non	ctrls	UCSF	UCSF	train	53847736	41.18	92.96
WB232	NA	NA	non	ctrls	UCSF	UCSF	train	58086380	39.83	90.64
WB233	NA	NA	non	ctrls	UCSF	UCSF	train	73022548	39.93	90.03
WB234	NA	NA	non	ctrls	UCSF	UCSF	train	57786964	39.99	93.88
WB235	NA	NA	non	ctrls	UCSF	UCSF	train	53606348	38.58	93.23
WB236	NA	NA	non	ctrls	UCSF	UCSF	train	81476780	34.54	94.89
WB237	NA	NA	non	ctrls	UCSF	UCSF	train	60928526	59.05	95.58
WB238	N	Female	non	ctrls	UCSF	UCSF	train	72848660	39.85	94.93
WB239	N	Female	non	ctrls	UCSF	UCSF	train	30996636	33.39	95.43
WB240	N	Male	non	ctrls	UCSF	UCSF	train	92584196	37.31	90.17
WB241	N	Female	non	ctrls	UCSF	UCSF	train	54392332	32.99	85.82
WB242	N	Male	non	ctrls	UCSF	UCSF	train	79678416	41.51	96.36
WB243	N	Female	non	ctrls	UCSF	UCSF	train	110792468	38.33	90.41
WB244	N	Female	non	ctrls	UCSF	UCSF	train	88087586	36.32	51.21
WB245	N	Female	non	ctrls	UCSF	UCSF	train	63962664	43.09	95.7
WB246	N	Female	non	ctrls	UCSF	UCSF	train	100549210	48.6	66.36
WB247	N	Male	non	ctrls	UCSF	UCSF	train	79093128	36.75	90.62
WB248	N	Female	non	ctrls	UCSF	UCSF	train	121080048	43.52	92.56
WB249	N	Male	non	ctrls	UCSF	UCSF	train	50513936	43.19	92.83
WB250	N	Male	non	ctrls	UCSF	UCSF	train	103194110	43.35	79.07
WB251	N	Male	non	ctrls	UCSF	UCSF	train	82098902	35.56	91.84
WB252	N	Male	non	ctrls	UCSF	UCSF	train	61392002	36.9	97.66
WB253	N	Female	non	ctrls	UCSF	UCSF	train	89916094	38.66	94.57
WB254	N	Male	non	ctrls	UCSF	UCSF	train	132701456	43.71	96.66
WB255	N	Male	non	ctrls	UCSF	UCSF	train	63186272	40.44	96.51
WB256	N	Male	non	ctrls	UCSF	UCSF	train	56169466	35.08	97.12
WB257	N	Female	non	ctrls	UCSF	UCSF	train	147749660	44.52	91.93
WB258	N	Female	non	ctrls	UCSF	UCSF	train	102443814	41.28	96.07
WB259	N	Male	non	ctrls	UCSF	UCSF	train	56857164	36.41	95.39
WB260	N	Female	non	ctrls	UCSF	UCSF	train	45192972	37.62	96.07
WB261	N	Male	non	ctrls	UCSF	UCSF	train	41868030	29.37	91.3
WB262	N	Male	non	ctrls	UCSF	UCSF	train	33374628	34	96.67
WB263	N	Female	non	ctrls	UCSF	UCSF	train	112298326	42.41	97.12
WB264	N	Female	non	ctrls	UCSF	UCSF	train	57584086	38.11	96.22
WB265	N	Female	non	ctrls	UCSF	UCSF	train	101369266	37.41	96.16
WB266	N	Female	non	ctrls	UCSF	UCSF	train	103458658	42.21	94.64
WB267	N	Female	non	ctrls	UCSF	UCSF	train	191440144	45.84	94.06
WB268	N	Female	non	ctrls	UCSF	UCSF	train	137700642	43.8	93.25
WB269	N	Female	non	ctrls	ARC	UCSF	train	41776522	36.64	85.56
WB270	N	Female	non	ctrls	ARC	UCSF	train	92876134	27.43	91.2
WB271	N	Female	non	ctrls	ARC	UCSF	train	51746636	38.69	88.48
WB272	N	Female	non	ctrls	ARC	UCSF	train	73397650	34.61	89.76
WB273	Y	Female	non	ctrls	ARC	UCSF	train	309129270	51.74	88.21
WB274	N	Male	non	ctrls	ARC	UCSF	train	122358218	51.19	87.75
WB275	N	Female	non	ctrls	ARC	UCSF	train	78207244	42.15	91.26
WB276	Y	Female	non	ctrls	ARC	UCSF	train	61862598	40.43	89.7
WB277	N	Male	non	ctrls	ARC	UCSF	train	53186460	39.28	89.74
WB278	Y	Female	non	ctrls	ARC	UCSF	train	73009070	41.85	89.97
WB279	Y	Male	non	ctrls	ARC	UCSF	train	45431352	36.1	87.72
WB280	N	Female	non	ctrls	ARC	UCSF	train	69201156	41.19	85.44
WB281	N	Male	non	ctrls	ARC	UCSF	train	26754194	34.46	88.39
WB282	N	Male	non	ctrls	ARC	UCSF	train	134441030	44.16	90.32
WB283	Y	Male	non	ctrls	ARC	UCSF	train	49131204	38.59	88.93
WB284	N	Female	non	ctrls	ARC	UCSF	train	29306598	35.54	91.1
WB285	N	Female	non	ctrls	ARC	UCSF	train	35082080	35.93	89.6
WB286	N	Male	non	ctrls	UCSF	UCSF	train	127993756	42.76	92.05
WB287	N	Male	non	ctrls	UCSF	UCSF	train	43738668	38.41	88.42
WB288	N	Male	non	ctrls	UCSF	UCSF	train	109145588	41.61	89.7
WB289	N	Female	non	ctrls	UCSF	UCSF	train	79777688	41.77	93.11
WB290	N	Female	non	ctrls	UCSF	UCSF	train	66893342	37.82	91.81
WB291	N	Female	non	ctrls	UCSF	UCSF	train	90147182	37.25	86.92
WB292	N	Female	non	ctrls	UCSF	UCSF	train	47057508	39.06	88.9
WB293	N	Female	non	ctrls	UCSF	UCSF	train	50187432	38.21	89.3
WB294	N	Male	non	ctrls	UCSF	UCSF	train	75735048	38.48	84.56
WB295	N	Female	non	ctrls	UCSF	UCSF	train	76126746	37.38	88.17
WB296	Y	Male	non	ctrls	ARC	UCSF	train	92131258	40.8	83.1
WB297	N	Female	non	ctrls	ARC	UCSF	train	114043606	43.64	87.42
WB298	N	Male	non	ctrls	ARC	UCSF	train	86271896	37.53	89.68
WB299	N	Male	non	ctrls	ARC	UCSF	train	126699534	43.05	93.21
WB300	N	Female	non	ctrls	ARC	UCSF	train	110131238	40.89	85.86
WB301	N	Male	lyme	lyme	Columbia	UCSF	test	61597990	38.19	94.42
WB302	Y	Male	lyme	lyme	Columbia	UCSF	test	515441058	37.4	98.28
WB303	N	Male	lyme	lyme	Columbia	UCSF	test	95237118	49	92.6
WB304	N	Male	lyme	lyme	LBB	UCSF	test	13750920	29.06	76.99
WB305	N	Female	lyme	lyme	LBB	UCSF	test	39014944	35.4	77.4
WB306	N	Female	lyme	lyme	LBB	UCSF	test	42837270	26.66	77.14
WB307	Y	Male	lyme	lyme	LBB	UCSF	test	41845090	29.85	79.1
WB308	N	Female	lyme	lyme	LBB	UCSF	test	48769752	45.11	85.67
WB309	N	Male	lyme	lyme	LBB	UCSF	test	47085134	46.3	84.98
WB310	N	Male	lyme	lyme	LBB	UCSF	test	89099542	21.71	77.45
WB311	N	Male	lyme	lyme	LBB	UCSF	test	34160702	35.12	80.72
WB312	N	Male	lyme	lyme	LBB	UCSF	test	41999258	38.38	87.15
WB313	N	Male	lyme	lyme	LBB	UCSF	test	43063668	37.98	94.41
WB314	N	Female	lyme	lyme	LBB	UCSF	test	66653030	32.43	94.13
WB315	N	Female	lyme	lyme	LBB	UCSF	test	77849810	30.02	95.72
WB316	Y	Male	lyme	lyme	LBB	UCSF	test	47403032	40.11	94.21
WB317	N	Male	lyme	lyme	LBB	UCSF	test	37892952	26.94	93.54
WB318	N	Male	lyme	lyme	LBB	UCSF	test	213504548	43.67	96.5
WB319	N	Female	lyme	lyme	LBB	UCSF	test	129284226	42.52	97.13
WB320	Y	Female	lyme	lyme	LBB	UCSF	test	67829674	39.1	93.04
WB321	Y	Male	lyme	lyme	LBB	UCSF	test	27156590	36.76	78.55
WB322	N	Female	lyme	lyme	LBB	UCSF	test	40454594	34.61	96.79
WB323	N	Male	lyme	lyme	LBB	UCSF	test	120103592	42.47	95.59
WB324	N	Female	non	babesia	LBB	UCSF	test	95741178	18.92	78.03
WB325	N	Male	non	babesia	LBB	UCSF	test	106378356	32.43	77.84
WB326	N	Male	non	babesia	ARC	UCSF	test	32130588	58.84	88.77
WB327	Y	Male	non	babesia	ARC	UCSF	test	39694920	41.07	85.86
WB328	N	Male	non	babesia	ARC	UCSF	test	51961326	42.43	83.25
WB329	N	Female	non	babesia	ARC	UCSF	test	23663798	46.21	82.53
WB330	N	Male	non	babesia	ARC	UCSF	test	19408800	33.76	82
WB331	N	Female	non	babesia	ARC	UCSF	test	47195068	41.93	85.66
WB332	N	Male	non	babesia	ARC	UCSF	test	21580222	20.73	81.67
WB333	N	Male	non	babesia	ARC	UCSF	test	49022786	13.36	86.12
WB334	Y	Male	non	babesia	ARC	UCSF	test	49028282	12.8	82.84
WB335	N	Male	non	babesia	ARC	UCSF	test	48602632	10.87	87.79
WB336	N	Female	non	babesia	ARC	UCSF	test	11510004	28.3	82.5
WB337	Y	Male	non	babesia	ARC	UCSF	test	36972714	15.34	86.94
WB338	N	Male	non	babesia	ARC	UCSF	test	22775110	19.57	68.77
WB339	N	Male	non	babesia	ARC	UCSF	test	36427190	17.3	86.58
WB340	Y	Male	non	babesia	ARC	UCSF	test	31501780	13.09	81.58
WB341	N	Male	non	babesia	ARC	UCSF	test	49543542	16.13	84.68
WB342	N	Male	non	babesia	ARC	UCSF	test	64284436	16.73	88.87
WB343	N	Female	non	babesia	ARC	UCSF	test	34128050	10.82	80.56
WB344	N	Male	non	babesia	ARC	UCSF	test	70485482	13.78	85.27
WB345	N	Female	non	babesia	ARC	UCSF	test	86545320	38.08	91.98
WB346	N	Female	non	babesia	ARC	UCSF	test	37963746	34.67	82.27
WB347	Y	Male	non	babesia	ARC	UCSF	test	51172046	38.82	90.43
WB348	Y	Female	non	babesia	ARC	UCSF	test	59258962	23.32	81.11
WB349	N	Male	non	babesia	ARC	UCSF	test	242146374	19.55	90.47
WB350	N	Female	non	babesia	ARC	UCSF	test	16258688	26.77	89.02
WB351	N	Male	non	babesia	ARC	UCSF	test	80392428	52.3	87.03
WB352	N	Female	non	babesia	ARC	UCSF	test	7257664	16.63	53.19
WB353	N	Female	non	babesia	ARC	UCSF	test	6286980	21.45	73.19
WB354	Y	Male	non	anaplasma	LBB	UCSF	test	42019492	36.77	92.39
WB355	Y	Female	non	anaplasma	LBB	UCSF	test	14300694	27.14	89.34
WB356	Y	Female	non	flu	UCSF	UCSF	test	103055378	38.75	95.64
WB357	Y	Female	non	flu	UCSF	UCSF	test	35128932	28.73	95.96
WB358	N	Male	non	flu	UCSF	UCSF	test	57223164	21.25	97.92
WB359	N	Female	non	flu	UCSF	UCSF	test	122939698	40.57	93.44
WB360	N	Female	non	flu	UCSF	UCSF	test	128127714	56.22	88.83
WB361	N	Female	non	flu	UCSF	UCSF	test	18755516	26.49	75.94
WB362	N	Female	non	sepsis	UCSF	UCSF	test	135210272	61.32	93.9
WB363	N	Female	non	sepsis	UCSF	UCSF	test	89199426	39.26	95.81
WB364	Y	Male	non	sepsis	UCSF	UCSF	test	66751830	35.36	94.72
WB365	Y	Male	non	sepsis	UCSF	UCSF	test	111465550	39.82	96.53
WB366	Y	Male	non	sepsis	UCSF	UCSF	test	285331210	48.14	92.13
WB367	Y	Male	non	sepsis	UCSF	UCSF	test	39876816	35.99	97.81
WB368	Y	Male	non	sepsis	UCSF	UCSF	test	81519932	43.84	93.74
WB369	Y	Male	non	sepsis	UCSF	UCSF	test	89027374	35.94	90.89
WB370	N	Male	non	sepsis	UCSF	UCSF	test	86948394	38.59	96.25
WB371	Y	Male	non	sepsis	UCSF	UCSF	test	120512080	51.2	91.3
WB372	N	Female	non	sepsis	UCSF	UCSF	test	101108114	71.94	89.78
WB373	N	Female	non	covid	UCSF	UCSF	test	93020360	77.83	87.99
WB374	N	Male	non	covid	UCSF	UCSF	test	127846496	26.69	89.17
WB375	N	Male	non	covid	UCSF	UCSF	test	83271742	29.65	88.77
WB376	N	Male	non	covid	UCSF	UCSF	test	110440180	33.62	84.4
WB377	N	Male	non	covid	UCSF	UCSF	test	174380952	63.08	81.52
WB378	N	Male	non	covid	UCSF	UCSF	test	147487572	48.59	88.52
WB379	Y	Male	non	covid	UCSF	UCSF	test	117101420	84.66	86.92
WB380	N	Female	non	covid	UCSF	UCSF	test	123253594	45	87.3
WB381	N	Female	non	covid	UCSF	UCSF	test	73271976	61.41	80.44
WB382	Y	Female	non	covid	UCSF	UCSF	test	55670192	42.52	80.02
WB383	N	Male	non	covid	UCSF	UCSF	test	33146454	41.6	79.75
WB384	N	Female	non	ctrls	LBB	UCSF	test	39181966	33.03	79.75
WB385	N	Male	non	ctrls	LBB	UCSF	test	49444698	27.6	87.62
WB386	N	Male	non	ctrls	LBB	UCSF	test	30513218	31.56	77.33
WB387	N	Female	non	ctrls	LBB	UCSF	test	13880116	26.18	94.77
WB388	N	Male	non	ctrls	LBB	UCSF	test	323466064	39.1	95.33
WB389	N	Female	non	ctrls	LBB	UCSF	test	108817986	42.07	91.31
WB390	NA	NA	non	ctrls	Columbia	UCSF	test	57065664	38.87	94.28
WB391	NA	NA	non	ctrls	Columbia	UCSF	test	63221022	42.76	96.01
WB392	NA	NA	non	ctrls	UCSF	UCSF	test	46745174	32.63	81.49
WB393	N	Male	non	ctrls	ARC	UCSF	test	142902712	41.19	93.16
WB394	N	Male	non	ctrls	ARC	UCSF	test	12162018	17.57	89.98
WB395	N	Female	non	ctrls	ARC	UCSF	test	34595334	34.91	92.32
WB396	N	Male	non	ctrls	ARC	UCSF	test	73754036	33.64	94.3
WB397	N	Male	non	ctrls	ARC	UCSF	test	33397470	66.14	79.29
WB398	N	Male	non	ctrls	ARC	UCSF	test	355202582	52.19	95.81
WB399	N	Male	non	ctrls	ARC	UCSF	test	76839966	29.01	93.52
WB400	N	Female	non	ctrls	ARC	UCSF	test	19114418	32.26	88.49
WB401	N	Male	non	ctrls	ARC	UCSF	test	105442714	38.73	93.97
WB402	N	Female	non	ctrls	ARC	UCSF	test	36533660	49.99	76.93
WB403	N	Male	non	ctrls	ARC	UCSF	test	31559644	23.46	82.61
WB404	N	Female	non	ctrls	ARC	UCSF	test	21108066	24.34	84.69
WB405	N	Female	non	ctrls	ARC	UCSF	test	27544638	11.3	71.89
WB406	N	Female	non	ctrls	UCSF	UCSF	test	94983134	43.03	91.55
WB407	N	Male	non	ctrls	UCSF	UCSF	test	57713882	35.88	89.31
WB408	N	Male	non	ctrls	UCSF	UCSF	test	41817880	31.76	94.45
WB409	N	Male	non	ctrls	UCSF	UCSF	test	112659612	37.68	94.95
WB410	N	Male	non	ctrls	UCSF	UCSF	test	82136690	37.02	94.08
WB411	NA	NA	non	ctrls	UCSF	UCSF	test	23670114	36.69	78.67
WB412	NA	NA	non	ctrls	UCSF	UCSF	test	78706456	89.24	81.79
WB413	NA	NA	non	ctrls	UCSF	UCSF	test	37123804	44.52	78.9
WB414	NA	NA	non	ctrls	UCSF	UCSF	test	78877426	41.17	84.56
WB415	NA	NA	non	ctrls	UCSF	UCSF	test	16589724	37.47	77.99
WB416	N	Female	non	ctrls	UCSF	UCSF	test	67964970	37.39	84.44
WB417	N	Female	non	ctrls	UCSF	UCSF	test	85206114	41.76	84.23
WB418	N	Male	non	ctrls	UCSF	UCSF	test	79536084	21.51	97.52
WB419	N	Female	non	ctrls	UCSF	UCSF	test	182349536	47.37	88.05
WB420	NA	Female	non	ctrls	UCSF	UCSF	test	52360092	35.52	95.04
WB421	NA	NA	non	ctrls	UCSF	UCSF	test	103778394	33.86	95.14
WB422	NA	NA	non	ctrls	UCSF	UCSF	test	16452570	30.25	90.98
WB423	N	Male	non	ctrls	UCSF	UCSF	test	139615758	41.77	94.5
WB424	N	Female	non	ctrls	ARC	UCSF	test	97521376	43.28	86.63
WB425	N	Female	non	ctrls	ARC	UCSF	test	141452926	44.06	94.58
WB426	Y	Female	non	ctrls	ARC	UCSF	test	34886648	23.16	85.92
WB427	N	Male	non	ctrls	ARC	UCSF	test	118518264	42	93.68
WB428	N	Male	non	ctrls	ARC	UCSF	test	108127692	46.36	94.12
WB429	N	Male	non	ctrls	ARC	UCSF	test	88558034	43.06	93.9
WB430	N	Male	non	ctrls	ARC	UCSF	test	94307492	36.53	94.79
WB431	N	Male	non	ctrls	ARC	UCSF	test	5871856	25.74	88.44
WB432	N	Male	non	ctrls	ARC	UCSF	test	5612252	23.26	88.4
WB433	N	Male	non	ctrls	ARC	UCSF	test	113571870	44.54	95.87
WB434	N	Female	non	ctrls	UCSF	UCSF	test	61842082	26.88	95.71
WB435	N	Female	non	ctrls	UCSF	UCSF	test	114571154	40.61	95.3
WB436	N	Female	non	ctrls	UCSF	UCSF	test	116103880	41.75	95.73
WB437	N	Male	non	ill_ctrls	LBB	UCSF	test	48581430	36.95	92.32
WB438	Y	Male	non	ill_ctrls	LBB	UCSF	test	4395814	17.08	92.99
WB439	N	Male	non	sepsis	SRA	external_site	test	70203880	39.43	96.12
WB440	N	Male	non	sepsis	SRA	external_site	test	83642476	43.61	96.63
WB441	Y	Female	non	sepsis	SRA	external_site	test	59228856	34.78	97.99
WB442	Y	Female	non	sepsis	SRA	external_site	test	66658388	37.85	97.04
WB443	Y	Male	non	sepsis	SRA	external_site	test	70495170	32.43	98.44
WB444	Y	Female	non	sepsis	SRA	external_site	test	73107256	53.83	95.27
WB445	N	Male	non	sepsis	SRA	external_site	test	17904626	35.01	97.84
WB446	N	Male	non	sepsis	SRA	external_site	test	18769306	35.22	97.93
WB447	Y	Female	non	sepsis	SRA	external_site	test	18934832	30.88	97.8
WB448	Y	Female	non	sepsis	SRA	external_site	test	19110824	31.02	97.83
WB449	N	Male	non	sepsis	SRA	external_site	test	61272380	52.96	97.1
WB450	Y	Male	non	sepsis	SRA	external_site	test	55981180	45.8	95.97
WB451	N	Male	non	sepsis	SRA	external_site	test	71267040	44.74	97.98
WB452	N	Male	non	sepsis	SRA	external_site	test	57445836	38.84	96.51
WB453	N	Female	non	sepsis	SRA	external_site	test	40689440	39.14	96.19
WB454	N	Male	non	sepsis	SRA	external_site	test	64779814	43.21	96.99
WB455	Y	Female	non	sepsis	SRA	external_site	test	48140102	54.4	97.23
WB456	Y	Male	non	sepsis	SRA	external_site	test	48427826	33.74	95.27
WB457	Y	Male	non	sepsis	SRA	external_site	test	74203298	37.44	95.83
WB458	N	Male	non	sepsis	SRA	external_site	test	76616758	35.94	95.74
WB459	Y	Male	non	sepsis	SRA	external_site	test	67351660	33.67	96.06
WB460	N	Female	non	sepsis	SRA	external_site	test	61575964	33.38	96.44
WB461	Y	Male	non	sepsis	SRA	external_site	test	76133440	33.88	97.11
