# Supplementary figures and images for: RNA Host Response-Based Diagnosis of Tick-Borne Infections using Machine Learning and Generative Artificial Intelligence
Source: Research Square preprint supplement (doi:10.21203/rs.3.rs-7643069/v1), 2025-09-30

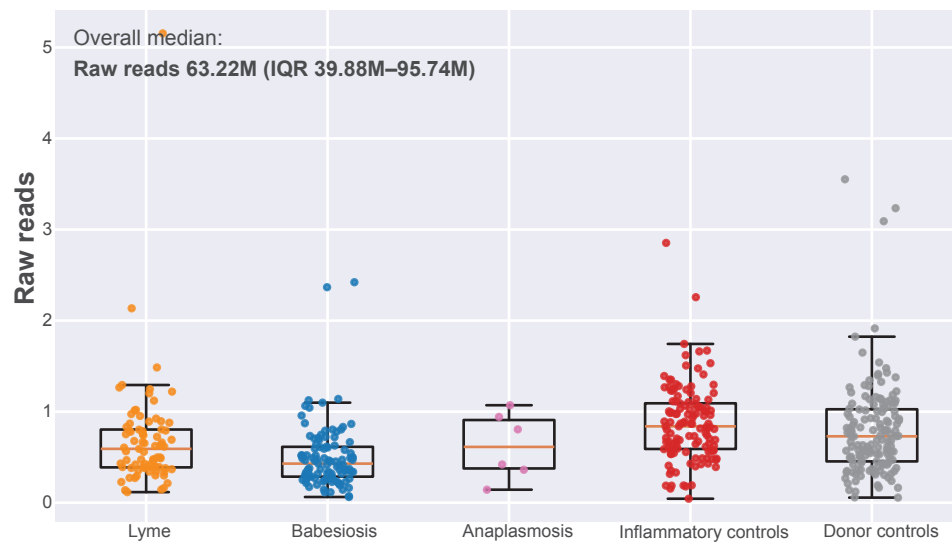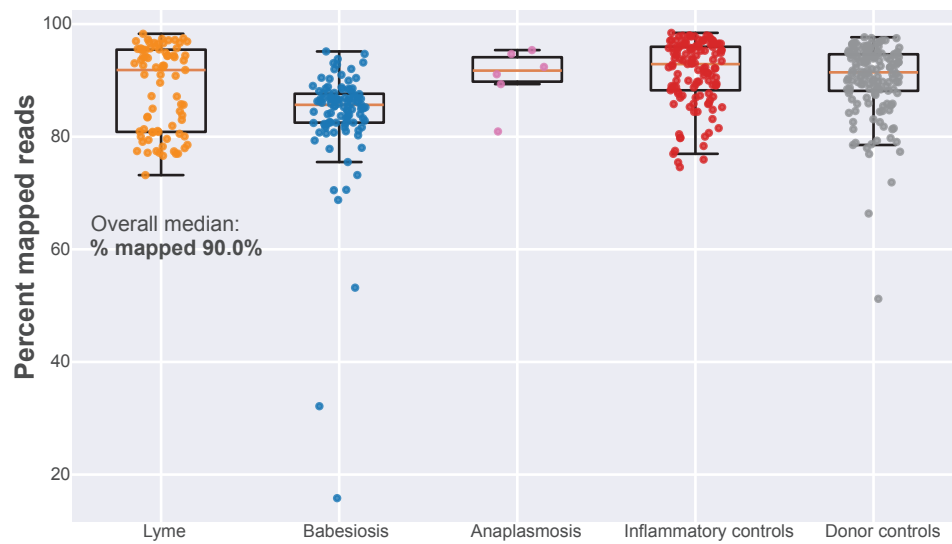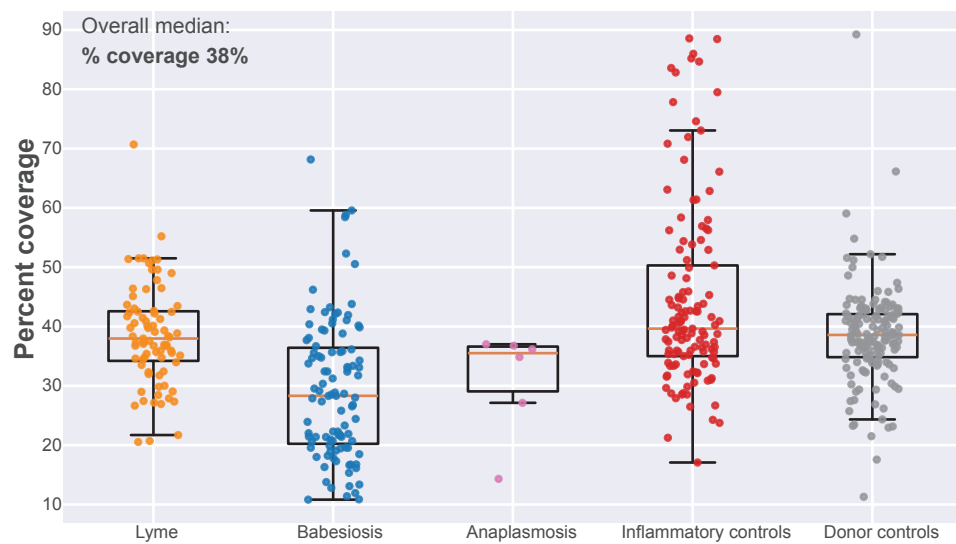

Supplement: Supplementary file 1 [file 1a2cbb266d20af41c6620123.pdf]
